# Supplementary material
Source: MDPI journal article supplement (https://www.mdpi.com/2076-3417/11/18/8314)
Supplement: s1 [file s1]

## Supplemental Information

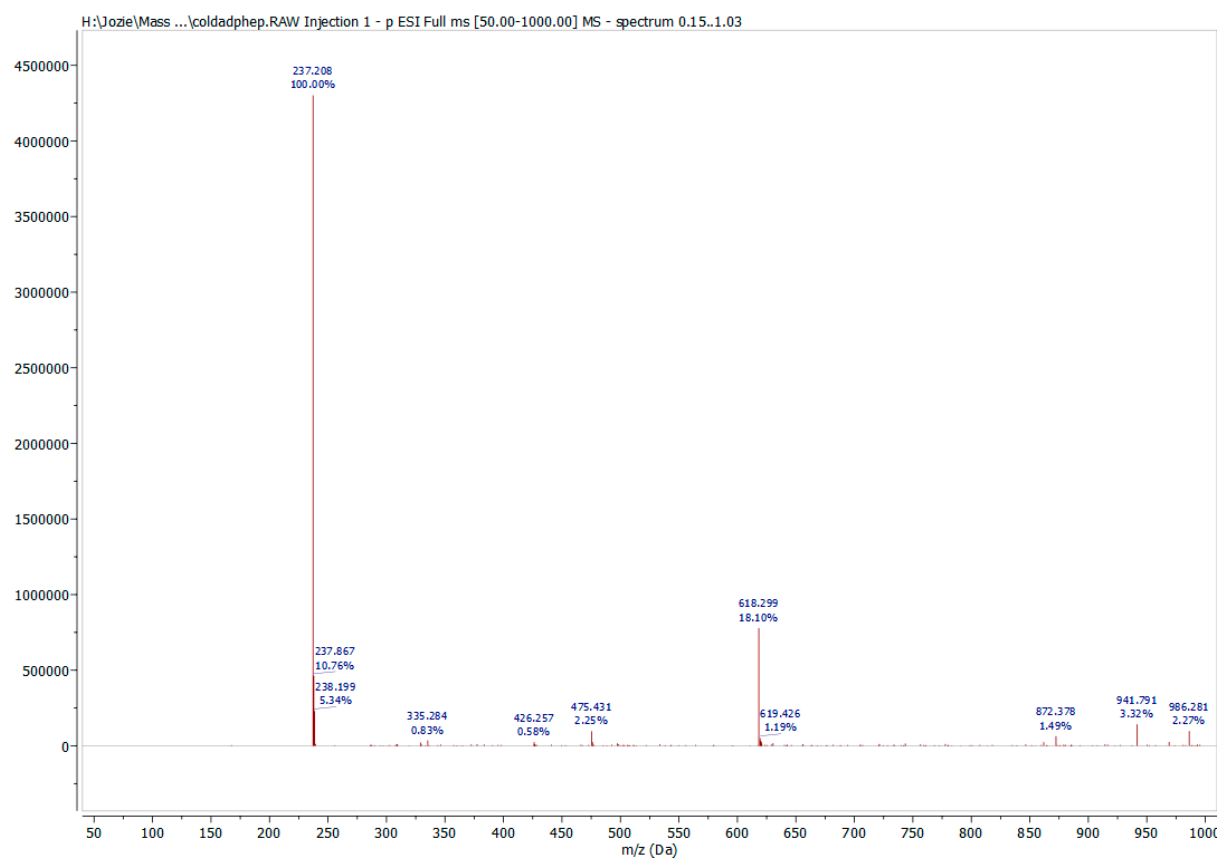

**Figure S1.** ESI-MS spectrum fraction from DEAE purification containing ADPH (m/z: 619)

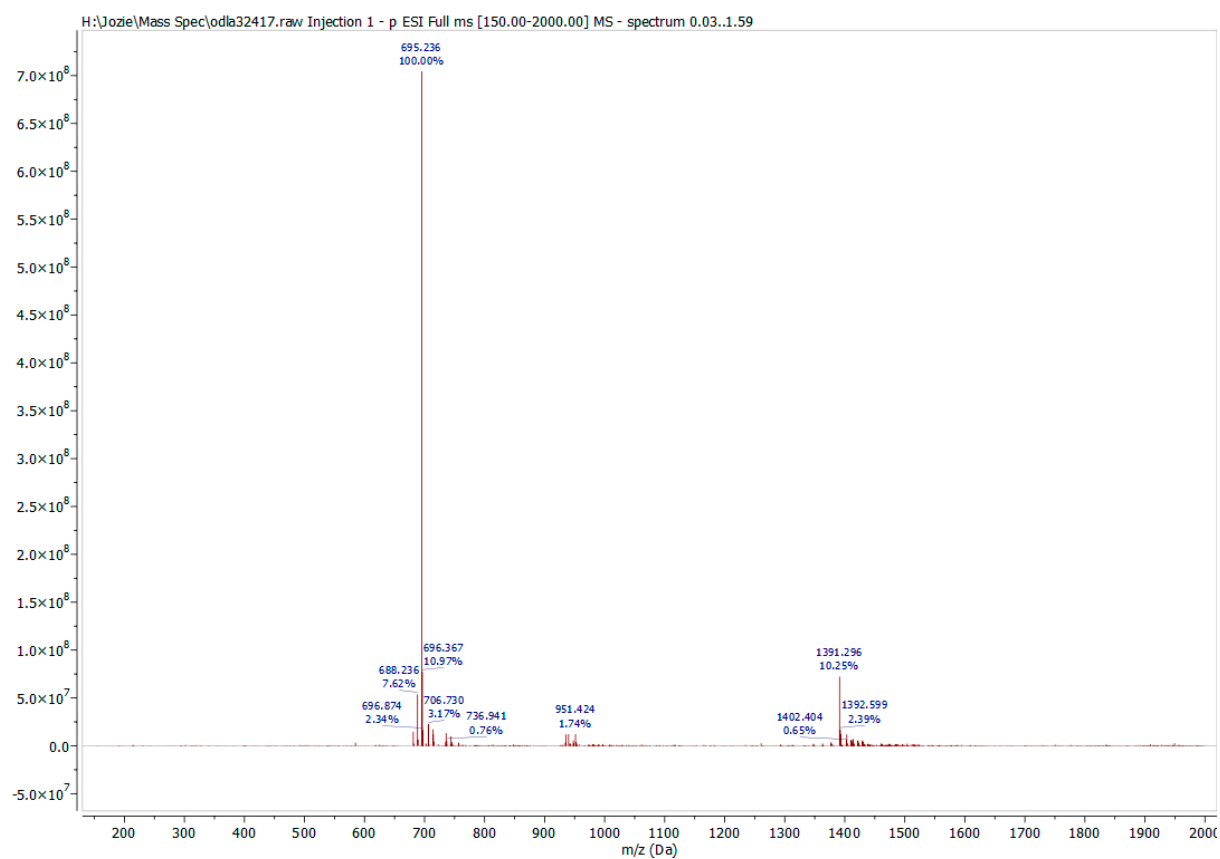

**Figure S2.** ESI-MS spectrum O-deacylated Kdo<sub>2</sub>-Lipid A (m/z:1391, m/z<sup>2</sup>:695)

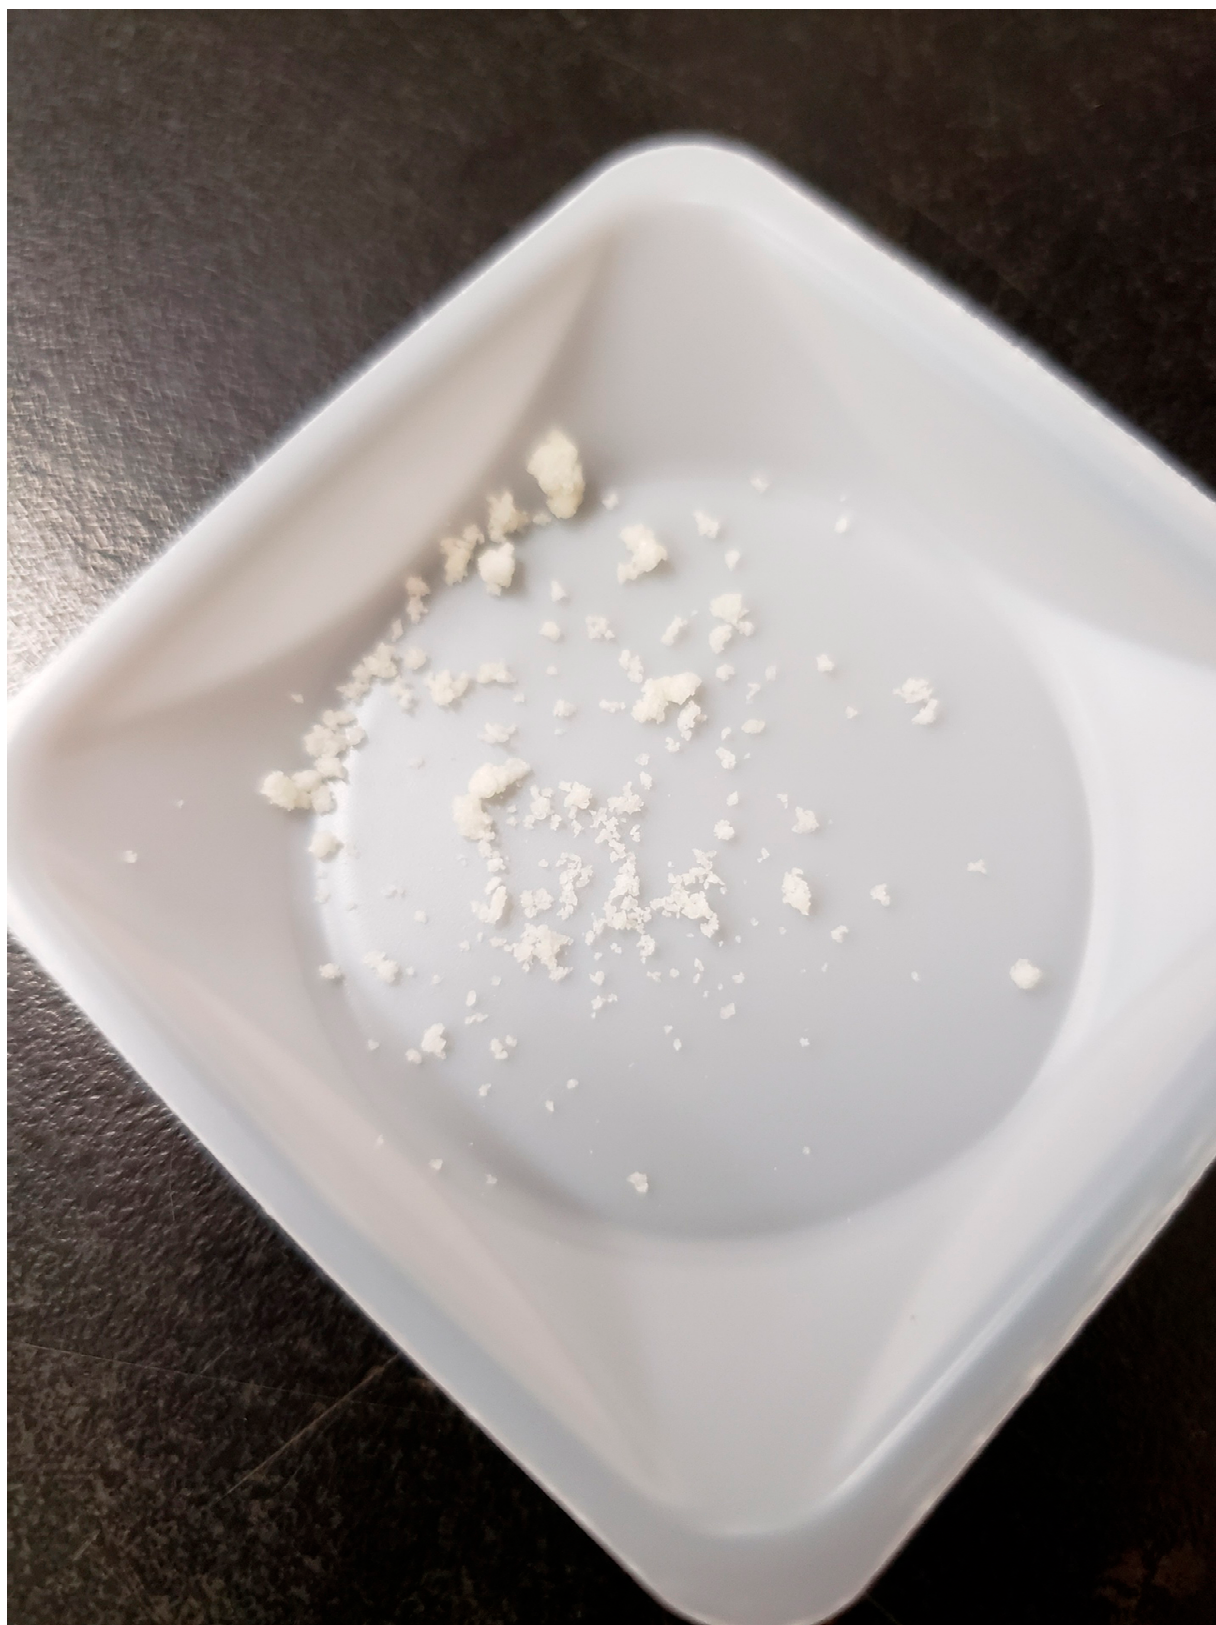

**Figure S3.** ADPH after lyophilization
